# Supplementary material
Source: publisher figshare collection journal article supplement (https://diabetesjournals.figshare.com/articles/dataset/_/12691793)
Supplement: Supplementary file 1 [file 1]

**Figure 1B. Standardized Glucose Management Algorithms****(a) Real-Time Adjustments**

| <b>For BG of:</b>               | <b>Treat with:</b>                                    |
|---------------------------------|-------------------------------------------------------|
| < 70 mg/dL                      | Glucose gel (15-30 g) if PO, or D50 (25-50 ml) if NPO |
| 70-79 mg/dL                     | Glucose gel (15 g) if PO, or D50 (25 ml) if NPO       |
| > 140 mg/dL before meals        | Correction insulin order, if no insulin in past 3hrs  |
| > 200 mg/dL at bedtime or 02:00 | Correction insulin order, if no insulin in past 3hrs  |

**(b) Daily Adjustments**

*Based on Q24 review of POC (for UC) and CGM data (Standard targets 100-180 mg/dl)*

| <b>Last 24 hour BG:</b>                                                             | <b>Insulin adjustments:</b>                                                                                                                                 |
|-------------------------------------------------------------------------------------|-------------------------------------------------------------------------------------------------------------------------------------------------------------|
| Fasting BG >150 mg/dL <u>and</u><br>no BG < 100 mg/dL overnight                     | ↑ basal insulin by 10%                                                                                                                                      |
| Fasting BG >250 mg/dL <u>and</u><br>no BG < 100 mg/dL overnight                     | ↑ basal insulin by 20%                                                                                                                                      |
| Any BG 80-100 mg/dL overnight                                                       | ↓ basal insulin by 10%                                                                                                                                      |
| Any BG < 80 mg/dL overnight                                                         | ↓ basal insulin by 20%                                                                                                                                      |
| Post-prandial BG ≥ 200 mg/dL at ≥2 meals<br><u>or</u> pre/post-meal rise > 60 mg/dL | Initiate prandial insulin at next meal <u>or</u> increase<br>prandial coverage to the next level; if at highest level,<br>increase prandial coverage by 25% |
| BG = Blood glucose.                                                                 |                                                                                                                                                             |
