# Supplementary material
Source: publisher figshare collection journal article supplement (https://diabetesjournals.figshare.com/articles/dataset/_/12691793)

Figure 1A.

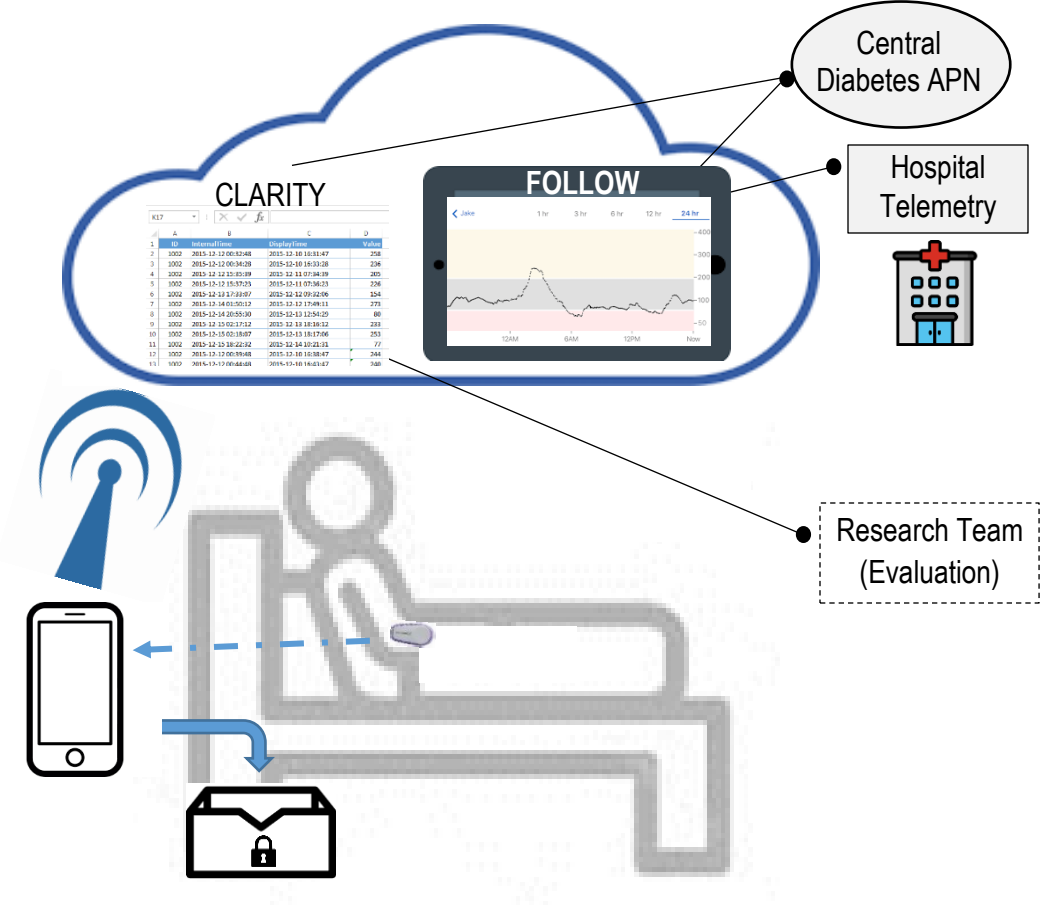

Supplement: Supplementary file 2 [file 1]
